# Supplementary material
Source: PubMed Central journal article supplement (PMC2673519)

Supplementary Figure 1

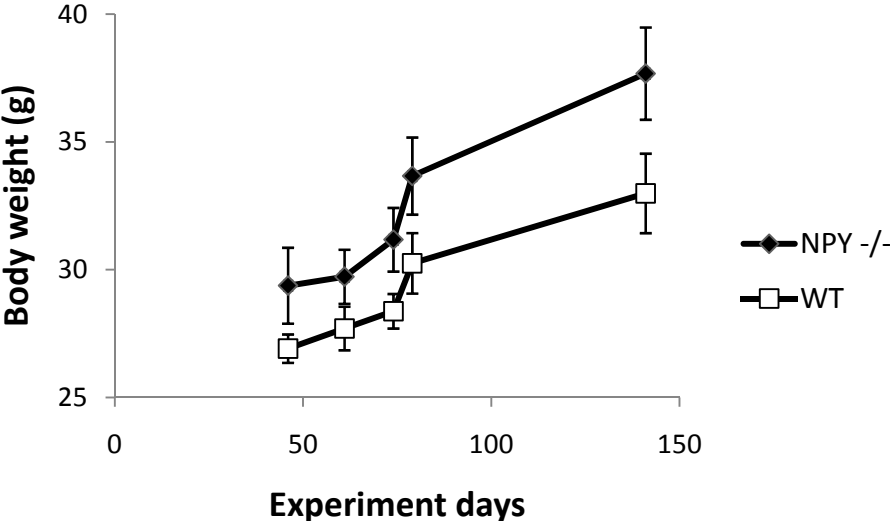

Supplement: NIHMS90422-supplement-01.pdf [file NIHMS90422-supplement-01.pdf]
